# Supplementary material
Source: HighWire-hosted journal article supplement (https://sti.bmj.com/content/sextrans-2020-054551)
Supplement: inline-supplementary-material-3 [file inline-supplementary-material-3.pdf]

Online supplementary figure 1. Percentage of people living with HIV in 25 countries who reported having discussed U=U with their healthcare provider, overall and by gender, Positive Perspectives Study, 2019 (N = 2389)

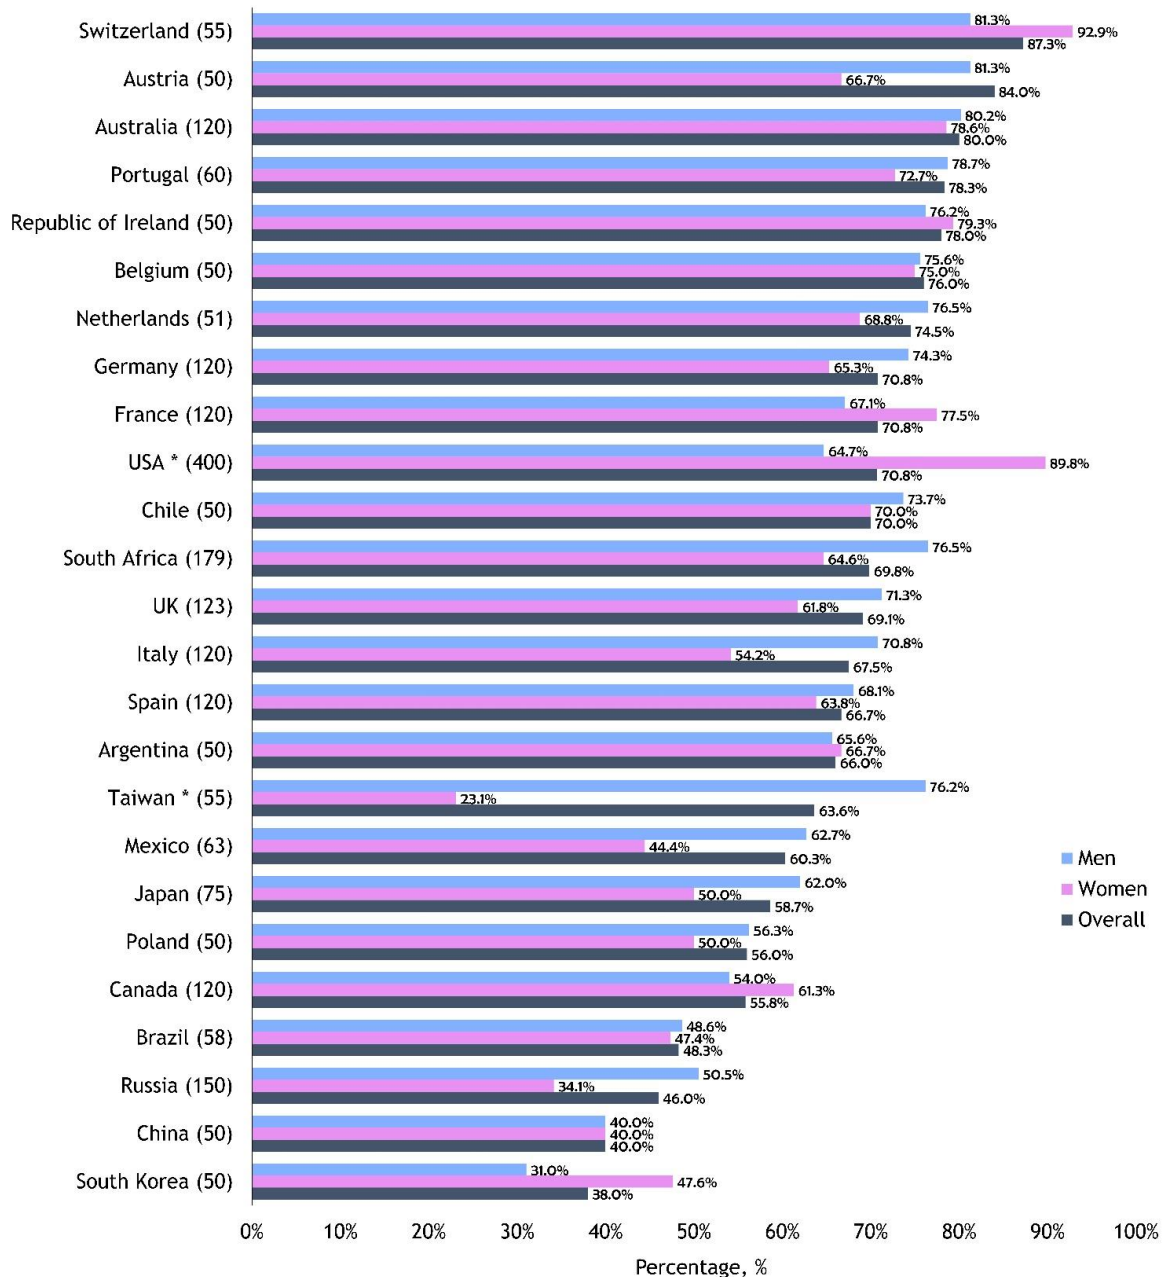

Note: Asterisks (\*) indicate statistically significant country-specific gender differences using  $\chi^2$  tests at  $p < 0.05$ .
