# Supplementary material
Source: HighWire-hosted journal article supplement (https://sti.bmj.com/content/sextrans-2020-054551)
Supplement: inline-supplementary-material-5 [file inline-supplementary-material-5.pdf]

Online supplementary table 3. Binary logistic regression analyses for the relationship between awareness of U = U and health outcomes within respective strata of gender and age, Positive Perspectives Study, 2019

| Outcomes                                                       | Categories of predictor variable | GENDER STRATA         |                        | AGE STRATA               |                        |
|----------------------------------------------------------------|----------------------------------|-----------------------|------------------------|--------------------------|------------------------|
|                                                                |                                  | AMONG MEN<br>(N=1623) | AMONG WOMEN<br>(N=696) | AMONG < 50 y<br>(N=1690) | AMONG ≥50 y<br>(N=699) |
| <b>Self-reported viral suppression</b>                         | Completely unaware of U = U      | 1.00 (referent)       | 1.00 (referent)        | 1.00 (referent)          | 1.00 (referent)        |
|                                                                | Aware from non-HCP sources       | 2.68 (1.73-4.16)      | 1.56 (0.87-2.78)       | 2.35 (1.62-3.42)         | 3.93 (1.53-10.07)      |
|                                                                | Informed by HCP                  | 3.17 (2.18-4.62)      | 1.81 (1.11-2.95)       | 2.94 (2.13-4.05)         | 2.52 (1.22-5.21)       |
| <b>Suboptimal adherence</b>                                    | Completely unaware of U = U      | 1.00 (referent)       | 1.00 (referent)        | 1.00 (referent)          | 1.00 (referent)        |
|                                                                | Aware from non-HCP sources       | 1.05 (0.7-1.58)       | 0.6 (0.35-1.02)        | 0.78 (0.54-1.12)         | 0.93 (0.47-1.85)       |
|                                                                | Informed by HCP                  | 0.65 (0.45-0.93)      | 0.41 (0.26-0.65)       | 0.49 (0.36-0.67)         | 0.58 (0.32-1.07)       |
| <b>Optimal overall health</b>                                  | Completely unaware of U = U      | 1.00 (referent)       | 1.00 (referent)        | 1.00 (referent)          | 1.00 (referent)        |
|                                                                | Aware from non-HCP sources       | 1.81 (1.26-2.60)      | 1.17 (0.7-1.96)        | 1.42 (1.01-1.99)         | 1.89 (1.07-3.36)       |
|                                                                | Informed by HCP                  | 2.22 (1.62-3.04)      | 1.68 (1.08-2.61)       | 2.09 (1.56-2.81)         | 1.84 (1.12-3.04)       |
| <b>Optimal mental health</b>                                   | Completely unaware of U = U      | 1.00 (referent)       | 1.00 (referent)        | 1.00 (referent)          | 1.00 (referent)        |
|                                                                | Aware from non-HCP sources       | 1.97 (1.36-2.86)      | 1.59 (0.95-2.65)       | 1.61 (1.14-2.28)         | 2.47 (1.38-4.41)       |
|                                                                | Informed by HCP                  | 2.95 (2.12-4.10)      | 2.09 (1.35-3.25)       | 2.57 (1.90-3.48)         | 2.98 (1.79-4.94)       |
| <b>Optimal physical health</b>                                 | Completely unaware of U = U      | 1.00 (referent)       | 1.00 (referent)        | 1.00 (referent)          | 1.00 (referent)        |
|                                                                | Aware from non-HCP sources       | 1.79 (1.25-2.57)      | 1.09 (0.66-1.83)       | 1.60 (1.13-2.25)         | 1.23 (0.70-2.16)       |
|                                                                | Informed by HCP                  | 2.46 (1.79-3.38)      | 1.49 (0.96-2.31)       | 2.70 (2.00-3.64)         | 1.21 (0.74-1.98)       |
| <b>Optimal sexual health</b>                                   | Completely unaware of U = U      | 1.00 (referent)       | 1.00 (referent)        | 1.00 (referent)          | 1.00 (referent)        |
|                                                                | Aware from non-HCP sources       | 1.14 (0.79-1.64)      | 1.15 (0.68-1.92)       | 1.21 (0.85-1.7)          | 0.88 (0.49-1.57)       |
|                                                                | Informed by HCP                  | 1.57 (1.14-2.16)      | 1.26 (0.81-1.95)       | 1.79 (1.33-2.42)         | 0.95 (0.57-1.57)       |
| <b>Comfortable sharing HIV status</b>                          | Completely unaware of U = U      | 1.00 (referent)       | 1.00 (referent)        | 1.00 (referent)          | 1.00 (referent)        |
|                                                                | Aware from non-HCP sources       | 1.59 (1.03-2.44)      | 1.19 (0.63-2.26)       | 1.29 (0.86-1.95)         | 2.24 (1.11-4.53)       |
|                                                                | Informed by HCP                  | 1.82 (1.24-2.67)      | 2.44 (1.42-4.19)       | 1.71 (1.19-2.44)         | 3.13 (1.66-5.92)       |
| <b>Always share HIV status</b>                                 | Completely unaware of U = U      | 1.00 (referent)       | 1.00 (referent)        | 1.00 (referent)          | 1.00 (referent)        |
|                                                                | Aware from non-HCP sources       | 1.93 (0.7-5.3)        | 1.82 (0.47-7.11)       | 1.98 (0.63-6.19)         | 2.09 (0.66-6.57)       |
|                                                                | Informed by HCP                  | 2.75 (1.09-6.93)      | 2.97 (0.89-9.91)       | 3.60 (1.29-10.02)        | 2.52 (0.88-7.19)       |
| <b>Shared HIV status with others besides HIV care provider</b> | Completely unaware of U = U      | 1.00 (referent)       | 1.00 (referent)        | 1.00 (referent)          | 1.00 (referent)        |
|                                                                | Aware from non-HCP sources       | 1.73 (1.03-2.91)      | 1.81 (0.94-3.49)       | 1.68 (1.07-2.64)         | 2.33 (0.97-5.61)       |
|                                                                | Informed by HCP                  | 1.74 (1.13-2.68)      | 2.2 (1.28-3.8)         | 1.60 (1.10-2.33)         | 5.58 (2.59-12.03)      |
| <b>Ever disguised/hid HIV medicines in past 6 months</b>       | Completely unaware of U = U      | 1.00 (referent)       | 1.00 (referent)        | 1.00 (referent)          | 1.00 (referent)        |
|                                                                | Aware from non-HCP sources       | 1.06 (0.71-1.57)      | 0.56 (0.32-0.98)       | 0.82 (0.56-1.21)         | 0.90 (0.50-1.61)       |
|                                                                | Informed by HCP                  | 0.65 (0.46-0.92)      | 0.55 (0.34-0.89)       | 0.60 (0.43-0.84)         | 0.68 (0.41-1.13)       |
| <b>Comfortable</b>                                             | Completely unaware of U = U      | 1.00 (referent)       | 1.00 (referent)        | 1.00 (referent)          | 1.00 (referent)        |

|                                                                                       |                             |                  |                  |                  |                  |
|---------------------------------------------------------------------------------------|-----------------------------|------------------|------------------|------------------|------------------|
| <b>discussing<br/>privacy issues<br/>with HCP</b>                                     | Aware from non-HCP sources  | 1.31 (0.91-1.89) | 2.07 (1.20-3.56) | 1.51 (1.06-2.16) | 1.40 (0.79-2.48) |
|                                                                                       | Informed by HCP             | 2.34 (1.69-3.23) | 3.04 (1.89-4.88) | 2.37 (1.74-3.24) | 2.80 (1.69-4.62) |
| <b>Comfortable<br/>discussing<br/>concerns about<br/>transmission with<br/>HCP</b>    | Completely unaware of U = U | 1.00 (referent)  | 1.00 (referent)  | 1.00 (referent)  | 1.00 (referent)  |
|                                                                                       | Aware from non-HCP sources  | 1.77 (1.23-2.56) | 2.89 (1.68-4.96) | 1.99 (1.40-2.83) | 2.28 (1.28-4.07) |
|                                                                                       | Informed by HCP             | 3.07 (2.22-4.24) | 4.26 (2.66-6.83) | 3.19 (2.34-4.35) | 3.73 (2.25-6.19) |
| <b>Missed ART for ≥<br/>5 times in past<br/>month because of<br/>privacy concerns</b> | Completely unaware of U = U | 1.00 (referent)  | 1.00 (referent)  | 1.00 (referent)  | 1.00 (referent)  |
|                                                                                       | Aware from non-HCP sources  | 0.83 (0.38-1.85) | 0.66 (0.29-1.5)  | 0.71 (0.38-1.35) | 0.51 (0.15-1.75) |
|                                                                                       | Informed by HCP             | 0.53 (0.26-1.07) | 0.23 (0.10-0.50) | 0.44 (0.25-0.76) | 0.14 (0.04-0.48) |

Note: U=U means undetectable equals untransmittable, HCP=healthcare provider, ART=antiretroviral therapy.
